# Supplementary material for: Incremental growth of therizinosaurian dental tissues: implications for dietary transitions in Theropoda
Source: PeerJ. 2017 Dec 11;5:e4129. doi: 10.7717/peerj.4129 (PMC5729821; doi:10.7717/peerj.4129)
Supplement: Supplemental Information 5 — Enamel Apposition Rates: calculated EAR in F. utahensis and S. megatherioides. EAR decreases by 52% in Suzhousaurus and LIG count is 85% greater than in Falcarius. However, enamel volume is 2.79 percentage points greater in the more derived taxon. Crown and Enamel Volumes: Calculated Crown volume and enamel percentage in sampled therizinosaurians. Teeth were approximated as elliptic cylinders with semi-major axis = crown base length and semi-minor axis = crown base width. Enamel volume was estimated as a hollow elliptic cylinder with thickness = average enamel thickness. [file peerj-05-4129-s005.xlsx]

## Sheet: Regression
		LIG width	# von Ebner lines	predicted	Residuals									LIG width	# von Ebner lines
	5.631	5.63078	26	26.3507	-0.350744												Falcarius
	5.601	5.60075	26	26.4921	-0.49207												Suzhousaurus
	4.827	4.8266	26	30.1356	-4.13561
	2.487	2.48667	37	41.1485	-4.1485															labels<-c("Falcarius","Suzhousaurus")
	4.536	4.53567	37	31.5049	5.49512										2.48667	1.82744				minor<-seq(1,6,.1)
	3.628	3.62767	37	35.7784	1.22161										3.47903	1.91957				par(mar=c(2.4,.1,.1,3))
	3.33	3.3304	37	37.1775	-0.177472										4.53567	1.95027				boxplot(boxwex=.5,S,F,yaxt="n",ylim=c(1,6),col=c("yellow","light blue"))
	1.827	1.82744	44	44.2511	-0.251133										5.21368	2.0664				axis(labels=labels,font=3,side=1,at=c(1,2),tick=FALSE,line=-.35)
	1.95	1.95027	44	43.673	0.326959										5.63078	2.41478				axis(side=4,at=c(1, 1.5, 2, 2.5, 3, 3.5, 4, 4.5, 5, 5.5, 6),labels=TRUE,tick=FALSE,line=-.35,las=1)
	2.415	2.41478	44	41.4868	2.51315															axis(side=4,at=c(1, 1.5, 2, 2.5, 3, 3.5, 4, 4.5, 5, 5.5, 6),labels=FALSE,tick=TRUE,line=0,tck=-.018,lwd=1.9)
														Med	1.05663	0.0307071				axis(side=4,at=minor,labels=FALSE,tick=TRUE,line=0,tck=-.008)
			=Falcarius											Q3	0.678008	0.116126
			=Suzhousaurus											Low	0.992367	0.0921212
														High	0.417103	0.348379
		5.35271	3.4951	2.06416
		0.263197	0.422731	0.178856										rand.perm(S, F, R=1000, alternative = "less", stat= "meandiff")
		5.61591	3.91783	2.24302			cor(rank(x), rank(y))							$pval
		5.08951	3.07237	1.88531			[1] -0.8989331		<-Spearman correlation					[1] 0.005	<-sig difference in lig widths between Falcarius and Suzhousaurus
							Strong correlation between number of von ebner and number of LIGs
														$Dobs
		5.63078	0.0258833											[1] -1.604576
		5.60075	0.0258833
		4.8266	0.0258833
		2.48667	0.0341095
		4.53567	0.0341095
		3.62767	0.0341095
		3.3304	0.0341095
		1.82744	0.053081
		1.95027	0.053081
		2.41478	0.053081
		# LIGs	# von Ebner lines
		9	26
		4	26
		5	26
		6	37
		6	37
		3	37
		5	37
		9	44
		11	44
		27	44

## Sheet: VEL width 1
UMNH VP 22857	Area	Mean	Min	Max	Angle	Dentin increment width (microns)		UMNH VP 22857	Area	Mean	Min	Max	Angle	Dentin increment width (microns)		Suzhousaurus	Area	Mean	Min	Max	Angle	Dentin increment width (microns)	Falcarius (combined)
1	24.774	169.815	78.302	247.325	58.671	35.998		1	6.97	104.43	89.449	123.091	111.801	10.404		1	7.358	76.015	1	128.417	93.576	10.547	10.404
2	34.233	123.191	6.812	252.393	61.39	50.456		2	10.068	101.558	83.922	142.77	109.179	15.349		2	8.656	84.417	30.333	145.667	90	12.5	15.349
3	26.575	154.162	70.619	244.37	64.747	39.223		3	6.583	87.815	83.5	98.75	111.801	9.861		3	7.358	79.61	61.458	84.792	86.424	10.547	9.861
4	33.332	100.216	67.279	152.515	62.021	49.034		4	9.293	108.911	83.705	147.209	114.444	14.49		4	11.686	132.889	60	218.333	90	17.105	14.49
5	25.675	151.746	70.387	222.084	60.255	37.852		5	10.068	99.806	84.356	124.209	116.565	15.4		5	13.85	126.695	65.731	178.968	88.152	20.405	15.4
6	23.422	171.128	84.26	234.387	62.928	34.219		6	8.519	102.374	83.515	140.965	111.801	13.02		6	8.656	117.267	77.333	205.667	90	12.5	13.02
7	34.683	133.583	45.385	221.854	62.418	51.034		7	8.519	95.443	83.272	114.599	111.801	13.02		7	7.791	116.908	84	143.314	86.634	11.203	13.02
8	61.709	173.859	40.538	251.399	61.356	91.307		8	9.681	143.095	84.392	208.444	116.565	15.214		8	10.388	149.627	83.696	191.304	87.51	15.146	15.214
9	17.567	95.189	79.287	137.739	62.103	25.613		9	30.591	128.127	84.145	214.879	115.907	48.425		9	18.178	114.58	60.959	167.358	91.397	26.981	48.425
10	21.621	91.779	42.803	144.425	62.354	31.616		10	13.94	87.146	82.879	96.221	110.556	21.802		10	9.955	122.145	25.667	194.318	87.397	14.488	21.802
11	18.918	153.312	82.859	242.786	60.255	27.249		11	15.489	97.242	83.005	136.402	118.496	24.501		11	12.985	128.478	84.333	171	90	19.079	24.501
12	40.989	177.824	83.762	246.37	62.865	60.434		12	36.399	116.574	82.078	160.812	116.288	57.701		12	13.417	90.871	36	147.667	90	19.737	57.701
13	31.53	134.247	78.905	233.62	63.435	46.623		13	25.557	88.679	82.052	103.722	115.769	40.451		13	28.566	106.541	40.067	163.579	89.119	42.768	40.451
14	17.567	93.152	71.907	121.878	62.103	25.819		14	15.876	125.097	88.9	172.333	113.962	24.894		14	15.149	129.333	51.667	202.333	90	22.368	24.894
15	31.08	100.759	76.349	142.719	60.046	45.675		15	25.17	99.639	84.567	122.333	114.59	40.101		15	12.985	147.411	83	222.667	90	19.079	40.101
16	20.269	95.728	64.747	135.334	62.85	29.82		16	16.263	99.974	83.813	131.094	113.385	25.275		16	17.746	82.821	55.333	95.667	90	26.316	25.275
17	17.116	65.803	30.072	85.933	62.745	25.012		17	35.237	103.095	83.101	170.381	113.703	56.107		17	14.716	129.147	21	197	90	21.71	56.107
18	23.873	115.44	48.443	224	60.945	34.853		18	24.008	102.089	69.847	147.302	115.301	38.044		18	27.267	123.604	40.339	196.882	89.076	40.794	38.044
19	25.675	131.045	75.349	227.46	59.744	37.295		19	18.199	89.756	83.469	105.408	115.463	28.573		19	22.939	127.285	19.321	179.724	86.698	34.267	28.573
20	13.062	60.405	16.676	96.865	67.068	19.035		20	21.297	86.317	81.319	95.124	114.702	33.784		20	10.388	120.167	38.667	185.667	90	15.131	33.784
21	12.612	94.407	62.214	127.846	63.435	18.213		21	34.85	91.873	82.572	131.259	113.114	55.562		21	17.313	150.21	83.308	204.735	88.531	25.666	55.562
22	28.377	126.382	84.192	226.364	60.141	41.514		22	34.85	92.383	64.645	202.939	113.962	55.517		22	15.581	155.436	84.219	207.048	88.363	23.035	55.517
23	14.864	122.319	83.667	195.236	65.095	21.219		23	35.237	163.703	84.343	232.134	114.286	56.066		23	17.313	161.708	83.333	221	90	25.658	56.066
24	6.756	155.316	84.173	251.778	59.744	9.438		24	39.884	124.935	83.56	200.374	114.305	63.483		24	10.388	94.986	15.333	189	90	15.131	63.483
25	6.306	105.846	83.303	194.66	65.556	8.406		25	23.621	118.74	84.222	165.951	113.575	37.152		25	13.417	47.721	18.111	84.678	88.091	19.748	37.152
26	7.657	134.533	83.796	238.074	66.801	10.407		26	12.778	113.651	84.667	169.211	111.801	20.106		26	16.88	104.991	77	161	90	25	20.106
Min					min	8.406		27	17.812	102.309	84.267	141.355	113.703	28.054		27	14.283	110.754	83.729	161.792	88.21	21.063	28.054
Max					max	91.307		Min					min	9.861		28	16.88	116.831	62.579	164.456	91.507	25.008	35.998
					average	34.8986		Max					max	63.483		29	17.313	124.275	76.333	192.667	90	25.658	50.456
													average	32.7674		30	14.716	119.667	69.667	172.333	90	21.71	39.223
																31	13.417	138.016	83.333	188.133	91.909	19.748	49.034
																32	16.447	120.899	58.973	190.874	88.452	24.351	37.852
																Min					min	11.203	34.219
																Max					max	42.768	51.034
																					average	23.1093	91.307
																							25.613
																							31.616
																							27.249
																							60.434
																							46.623
																							25.819
																							45.675
																							29.82
																							25.012
																							34.853
																							37.295
																							19.035
																							18.213
																							41.514
																							21.219
																							9.438
																							8.406
																							10.407

## Sheet: Enamel Apposition Rates
Increment width = section width/number of incremental lines
	Enamel	Section Width (in microns)	# of lines	Avg. increment width = apposition rate	(in microns)	Enamel growth rate (mL/LIG)		t.test(Falcarius.EAR,Suzhousaurus.EAR)
Specimen:	Section
UMNH VP 22857	1	50.677	9	5.63078
	2	22.403	4	5.60075					Welch Two Sample t-test
	3	24.133	5	4.8266				data: Falcarius.EAR and Suzhousaurus.EAR
	Mean		6	5.35271		0.0001105		t = 4.6059, df = 7.4885, p-value = 0.00207
								alternative hypothesis: true difference in means is not equal to 0
UMNH VP 15231	1	14.92	6	2.48667				95 percent confidence interval:
	2	27.214	6	4.53567				1.098664 3.355442
	3	10.883	3	3.62767				sample estimates:
	4	16.652	5	3.3304				mean of x mean of y
	Mean		5	3.4951		0.000146		4.291218 2.064165
								Significantly faster EAR in Falcarius
Suzhousaurus	1	16.447	9	1.82744
	2	21.453	11	1.95027
	3	65.199	27	2.41478
	Mean		15.6667	2.06416		0.00018766

## Sheet: Crown & Enamel Volumes
V = (pi)abh*.77276			<-based on correction from 3D scan
UMNH VP 22587																Units?
Crown height (cm)			Crown base length (cm)			Crown base width (cm)		Average Enamel thickness (cm)					Approximated as cylinder			cc/mL	cc/mL	<--Dropdown Menu
0.4265			0.3538			0.2184		0.00195		cc/mL	cubic mm	cubic microns	Volume				cubic mm
Total length (cm)			Semimajor axis (cm)			Semiminor axis (cm)				0.0200016	20.0016	2.00016e+10	0.0200016	cc/mL			cubic μm
1.6		a=	0.1769		b=	0.1092				0.019339	19.339	19300000000	0.019339	cc/mL
		a'=	0.17495		b'=	0.10725				0.000662541	0.662541	663000000	0.000662541	cc/mL		Total Crown Volume
		h'=	0.42455										0.0331244	enamel: Crown volume		Crown - enamel
																Total Enamel Volume
Suzhousaurus
Crown height (cm)			Crown base length (cm)			Crown base width (cm)		Average Enamel thickness (cm)					Approximated as cylinder
0.8808			0.3778			0.2708		0.00395		cc/mL	cubic mm	cubic microns	Volume
Total length (cm)			Semimajor axis (cm)			Semiminor axis (cm)				0.0546918	54.6918	5.46918e+10	0.0546918	cc/mL
2.172		a=	0.1889		b=	0.1354				0.0517529	51.7529	51800000000	0.0517529	cc/mL
		a'=	0.18495		b'=	0.13145				0.00293892	2.93892	2.89183e+09	0.00293892	cc/mL
		h'=	0.87685										0.053736	enamel: Crown volume
UMNH VP 15231
Crown height (cm)			Crown base length (cm)			Crown base width (cm)		Average Enamel thickness (cm)
0.621			0.362			0.25		0.00142		cc/mL	cubic mm	cubic microns	Volume
Total length (cm)			Semimajor axis (cm)			Semiminor axis (cm)				0.0341094	34.1095	34109451000	0.0341094	cc/mL		Aproximate as cylinder?
1.3224		a=	0.181		b=	0.125				0.0333791	33.3791	19300000000	0.0333791	cc/mL		No	Yes	<--Dropdown Menu
		a'=	0.179577		b'=	0.123577				0.000730332	0.730335	14809451000	0.000730332	cc/mL			No
		h'=	0.619576										0.0214114	enamel: Crown volume

## Sheet: VEL width redo
UMNH VP 22857	Dentin increment width (microns)		UMNH VP 22857	Dentin increment width (microns)		Falcarius (combined)		Suzhousaurus	Dentin increment width (microns)
1	6.321		1	8.22		6.321		1	22.867
2	10.963		2	5.374		10.963		2	21.163
3	16.611		3	13.256		16.611		3	19.045
4	9.967		4	14.981		9.967		4	20.836
5	12.292		5	8.777		12.292		5	24.146
6	21.618		6	11.397		21.618		6	30.474
7	13.621		7	18.136		13.621		7	27.873
8	15.618		8	12.079		15.618		8	26.535
9	13.621		9	9.421		13.621		9	20.769
10	35.55		10	12.325		35.55		10	15.559
11	21.937		11	25.425		21.937		11	30.549		t.test(Falcarius.DDR,Suzhousaurus.DDR)
12	23.258		12	10.848		23.258		12	21.817		Welch Two Sample t-test
13	9.302		13	8.988		9.302		13	25.04
14	34.558		14	32.661		34.558		14	21.31		data: Falcarius.DDR and Suzhousaurus.DDR
15	32.241		15	21.467		32.241		15	25.946		t = 1.4706, df = 96.337, p-value = 0.1446
16	39.208		16	10.163		39.208		16	24.243		alternative hypothesis: true difference in means is not equal to 0
17	57.823		17	8.833		57.823		17	19.066		95 percent confidence interval:
18	31.245		18	19.674		31.245		18	23.263		-0.9264878 6.2254718
19	28.906		19	57.417		28.906		19	20.769		sample estimates:
20	26.91		20	22.053		26.91		20	23.092		mean of x mean of y
21	36.879		21	39.602		36.879		21	20.114		24.57623 21.92673
22	55.818		22	27.25		55.818		22	8.458		=no significant trend in DDR
23	49.197		23	49.237		49.197		23	20.114
24	32.585		24	17.018		32.585		24	14.283
25	14.618		25	12.664		14.618		25	18.555
26	28.27		26	47.35		28.27		26	18.637
27	47.841		27	39.265		47.841		27	21.31
28	16.31		28	29.778		16.31		28	25.293
29	42.214		29	29.003		42.214		29	26.743
30	37.246		30	36.054		37.246		30	19.933
31	31.589		31	11.616		31.589
32	19.601		32	34.257		19.601
			33	23.949		8.22
Trimmed mean =	26.9865		34	36.201		5.374
0.05			35	19.736		13.256
			36	16.432		14.981
			37	21.932		8.777
			38	24.646		11.397
			39	23.689		18.136
						12.079
						9.421
						12.325
						25.425
						10.848
						8.988
						32.661
						21.467
						10.163
						8.833
						19.674
						57.417
						22.053
						39.602
						27.25
						49.237
						17.018
						12.664
						47.35
						39.265
						29.778
						29.003
						36.054
						11.616
						34.257
						23.949
						36.201
						19.736
						16.432
						21.932
						24.646
						23.689

## Sheet: Sheet2
1	11.261	177.925	127.333	211.671	-126.384	15.839
2	16.215	134.963	102.333	161.08	-120.964	23.48
3	30.179	139.51	80.333	196.405	-120.816	44.544
4	19.368	120.678	68.667	163.69	-126.327	28.323
1	27.239	119.771	101.467	137.919	129.588	42.706
2	29.643	143.199	92.666	184.47	131.112	46.203
3	17.225	129.046	92.964	157.401	130.156	26.499
4	20.83	46.785	33.346	63.216	131.82	32.272
5	8.012	105.437	90	114.783	128.66	12.158
6	7.21	101.876	83.333	116.61	120.964	11.071
7	8.012	96.56	88.667	104.815	141.34	12.158
1	22.37	178.821	129.208	210	-67.751	32.121
2	14.153	189.767	156.053	213.364	-61.699	19.952
3	24.653	218.804	174.671	245.416	-60.524	35.702
4	19.631	119.196	97.156	141.796	-58.57	28.507
5	19.631	121.085	91.596	145.256	-58.57	28.507
6	10.5	109.469	102.697	119.57	-56.31	14.617
7	9.587	122.458	94.62	146.333	-45	13.378
8	6.848	145.266	139.204	152.333	-45	9.555

## Sheet: Sheet1
Falcarius				Enamel
	Area	UMNH VP 22857	IMG	Mean	Min	Max	Angle	Length		Increments	Average thickness
1	1.292			117.381	12.051	222.609	56.969	51.145	μm	8	6.39313	μm
Suzhousaurus		UMNH VP 15231	IMG	Mean	Min	Max	Angle	Length		Increments	Average thickness
	Area	Suzhousaurus	IMG	Mean	Min	Max	Angle	Length		Increments
1	0.647			92.755	24	211	90	25.786	μm	13	1.98354	μm
2	0.372			114.372	42	192.967	-18.988	14.802	μm	10	1.4802	μm
											1.73
										Ratio:	3.69545
